# Supplementary material for: In situ atomic-scale observation of dislocation climb and grain boundary evolution in nanostructured metal
Source: PubMed Central journal article supplement (PMC9293973; doi:10.1038/s41467-022-31800-8), 2022-07-18
Supplement: 41467_2022_31800_MOESM3_ESM.pdf [file 41467_2022_31800_MOESM3_ESM.pdf]

## **Description of Additional Supplementary Files**

File Name: Supplementary Movie 1

Description: In situ bending deformation of an Au ligament, recorded at a rate of 30 frames per second and played at 5x speed.

File Name: Supplementary Movie 2

Description: Fast dislocation climb at the final stage of deformation, recorded at a rate of 30 frames per second and played at 0.2x speed.

File Name: Supplementary Movie 3

Description: Positive dislocation climb with the evolution of dislocation core, recorded at a rate of 30 frames per second and played at 0.125x speed.

File Name: Supplementary Movie 4

Description: Negative dislocation climb with the evolution of dislocation core, recorded at a rate of 30 frames per second and played at 0.2x speed.

File Name: Supplementary Movie 5

Description: Another example of positive dislocation climb and the evolution of dislocation core, recorded at a rate of 30 frames per second and played at 0.125x speed.
